# Supplementary material
Source: PubMed Central journal article supplement (PMC1459370)

# Hoxa2 r3/5 sequence alignment

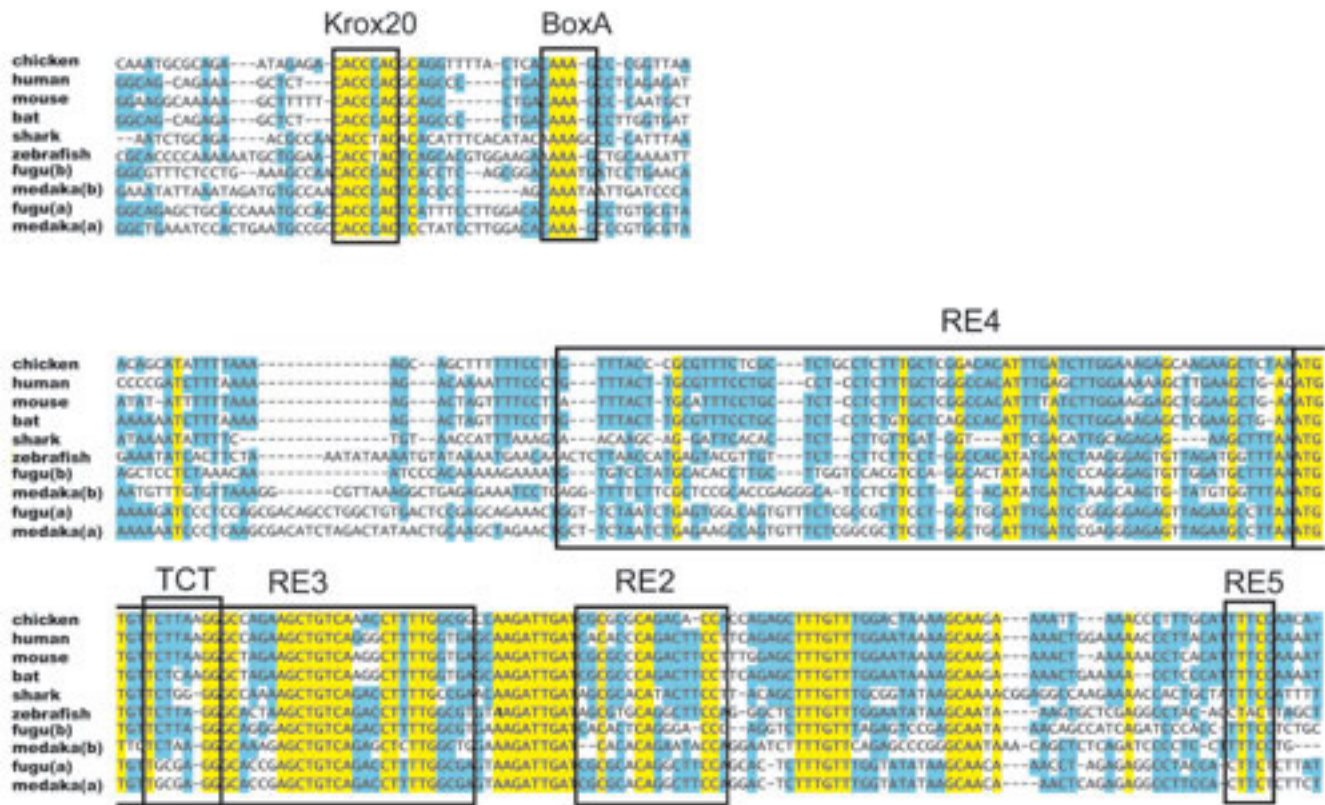

Supplement: pnas_0600993103_1.pdf [file pnas_0600993103_1.pdf]

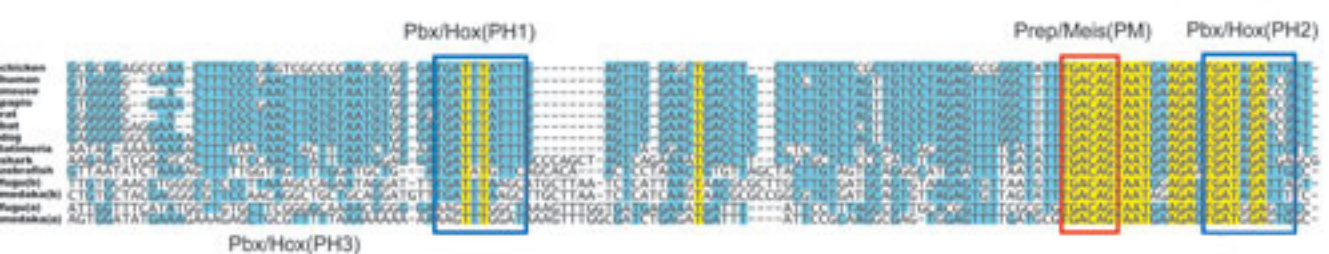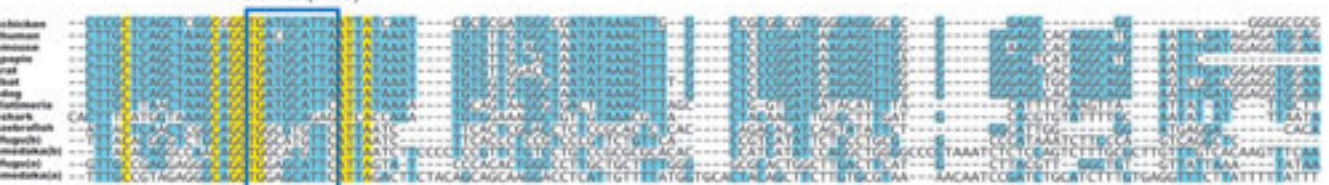

Supplement: pnas_0600993103_2.pdf [file pnas_0600993103_2.pdf]

# Hoxa2 r2 sequence alignment

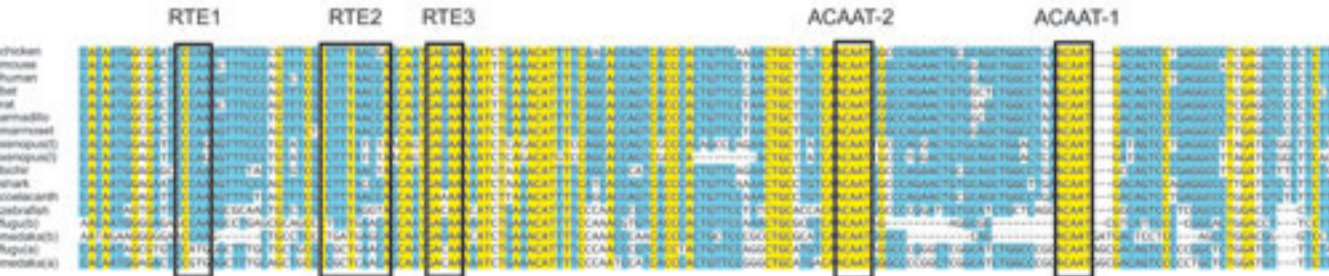

Supplement: pnas_0600993103_3.pdf [file pnas_0600993103_3.pdf]
